# Supplementary material for: Home environment: respiratory and allergic phenotypes from birth to age six in the PELAGIE cohort
Source: PubMed Central journal article supplement (PMC6658488; doi:10.1038/s41533-019-0141-y), 2019-07-25
Supplement: 41533_2019_141_MOESM2_ESM.pdf [file 41533_2019_141_MOESM2_ESM.pdf]

**Supplementary table 1. Respiratory/allergic symptoms in phenotypes identified in the clustering-analysis**

|                                  |   | Phenotypes |      |                 |      |              |      |              |      |       |      |
|----------------------------------|---|------------|------|-----------------|------|--------------|------|--------------|------|-------|------|
|                                  |   | Reference  |      | Transient Cough |      | Eczema/cough |      | Wheeze/cough |      | Mixed |      |
|                                  |   | N= 294     |      | N=341           |      | N=115        |      | N=110        |      | N=75  |      |
| Child's age at follow-up (years) |   | n          | %    | n               | %    | n            | %    | n            | %    | n     | %    |
| Rash                             | 1 | 30         | 10.2 | 31              | 9.1  | 109          | 94.8 | 30           | 27.3 | 31    | 41.3 |
|                                  | 2 | 23         | 7.8  | 24              | 7.0  | 110          | 95.7 | 30           | 27.3 | 28    | 37.3 |
|                                  | 6 | 40         | 13.6 | 20              | 5.9  | 38           | 33.0 | 22           | 20.0 | 19    | 25.3 |
| Wheezing                         | 1 | 4          | 1.4  | 0               | 0.0  | 9            | 7.8  | 110          | 100  | 26    | 34.7 |
|                                  | 2 | 3          | 1.0  | 23              | 6.7  | 5            | 4.3  | 85           | 77.3 | 29    | 38.7 |
|                                  | 6 | 12         | 4.1  | 20              | 5.9  | 17           | 14.8 | 25           | 22.7 | 15    | 20.0 |
| Rhinitis                         | 1 | 0          | 0.0  | 0               | 0.0  | 0            | 0.0  | 0            | 0.0  | 75    | 100  |
|                                  | 2 | 0          | 0.0  | 0               | 0.0  | 0            | 0.0  | 0            | 0.0  | 75    | 100  |
|                                  | 6 | 8          | 2.72 | 7               | 2.1  | 15           | 13.1 | 9            | 8.2  | 17    | 22.7 |
| Cough                            | 1 |            |      |                 |      |              |      |              |      |       |      |
|                                  | 2 | 0          | 0.0  | 341             | 100  | 75           | 65.2 | 105          | 95.5 | 49    | 65.3 |
|                                  | 6 | 71         | 24.2 | 86              | 25.2 | 39           | 33.9 | 32           | 29.1 | 31    | 41.3 |

**Supplementary table 2: Comorbidities associated with respiratory and allergic phenotypes**

|                                 | Phenotypes |                 |              |              |       | p-value <sup>2</sup> |
|---------------------------------|------------|-----------------|--------------|--------------|-------|----------------------|
|                                 | Reference  | Transient cough | Eczema/cough | Wheeze/cough | Mixed |                      |
|                                 | N=294      | N=341           | N=115        | N=110        | N=75  |                      |
|                                 | %          | %               | %            | %            | %     |                      |
| Otitis Media <sub>1</sub>       | 58.4       | 65.0            | 64.9         | 72.9         | 72.6  | 0.04                 |
| Woken by breathlessness         | 2.7        | 3.8             | 7.0          | 15.5         | 10.8  | <0.0001              |
| Woken by respiratory discomfort | 9.2        | 16.2            | 13.9         | 38.2         | 41.9  | <0.0001              |
| Hay fever                       | 4.8        | 3.5             | 14.8         | 10.0         | 27.0  | <0.0001              |
| Other allergic rhinitis         | 5.8        | 3.2             | 15.5         | 11.9         | 24.3  | <0.0001              |

Missing values: 1: n=42, else n=2. 2 Chi square test.
